# Supplementary material for: Interfacial engineering boosting the photocatalytic performance of a CdS/C3N5 heterojunction for organic pollutant degradation: mechanism, degradation pathway, and DFT calculation
Source: Royal Society of Chemistry journal article supplement (doi:10.1039/d3cy01698f), 2024-01-01
Supplement: d3cy01698f1.pdf [file d3cy01698f1.pdf]

## Supporting Information

### **Interfacial engineering boosting the photocatalytic performance of CdS/C<sub>3</sub>N<sub>5</sub> heterojunction for organic pollutants degradation: Mechanism, degradation pathway, and DFT calculation**

Jian Wang, Derui Chen, Chenwei Ma, Yuanjing Du, Huinan Che\*, Yanhui Ao

Key Laboratory of Integrated Regulation and Resource Development on Shallow Lakes,  
Ministry of Education, College of Environment, Hohai University, No.1, Xikang road,  
Nanjing, 210098, China

#### **Characterization of samples**

The crystalline structure of the samples was characterized by X-ray diffractometer from Rigaku, Japan (XRD). X-ray photoelectron spectroscopy (XPS, Thermo, Escalab 250Xi, USA) was performed to determine the elemental composition and electronic structure. The micromorphology and microstructure were observed using the transmission electron microscope (TEM, JEOL, JEM-2100F) and scanning electron microscope (SEM, Hitachi, S-4800). The elemental species and distribution of the samples were analyzed using SEM coupled with Energy dispersive spectrometer (EDS). The performance of samples was tested by a UV-vis spectrophotometer (UV-VIS DRS, Shimadzu, UV3600). Photogenerated charge separation ability was tested by fluorescence spectrometer (PL, Hitachi, F-7000).

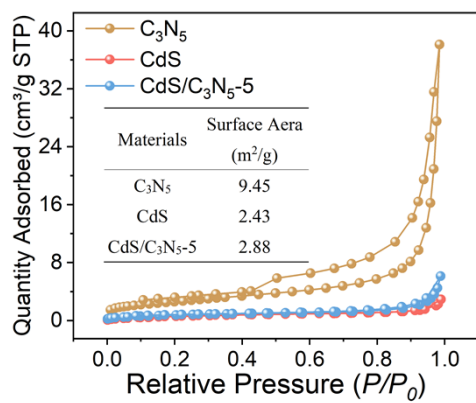

**Figure S1.** N<sub>2</sub> adsorption-desorption isotherms of as-prepared samples.

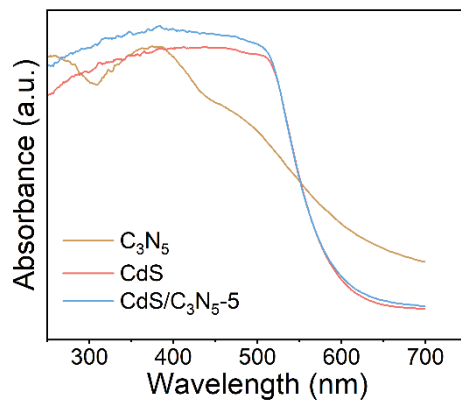

**Figure S2.** Plots of transformed Kubelka-Munk function versus photon energy of C<sub>3</sub>N<sub>5</sub>, CdS and CdS/C<sub>3</sub>N<sub>5</sub>-5.

**Table S1.** The molecular structure of intermediate products that may be formed by mineralization of

|    | Structure                                                                           | Molecular formula       | Mass-charge (m/z) |
|----|-------------------------------------------------------------------------------------|-------------------------|-------------------|
| MO | 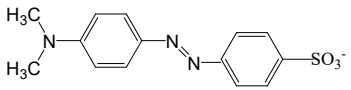   | $C_{16}H_{21}N_3O_3S^-$ | 309               |
| P1 |    | $C_{16}H_{21}N_3O_4S^-$ | 353               |
| P2 |    | $C_{15}H_{21}N_3O_4S^-$ | 339               |
| P3 |    | $C_{16}H_{25}N_3O_5S^-$ | 371               |
| P4 |  | $C_6H_8N_2$             | 108               |
| P5 |  | $C_7H_{10}N_2$          | 122               |
| P6 |  | $C_6H_6N_2$             | 110               |

molecule MO.
